# Supplementary material for: Perovskite Nano-Powder and Nano-Film Catalysts in Mineralization of Aqueous Organic Contaminants through Solar Simulated Radiation
Source: MDPI journal article supplement (doi:10.3390/pr11082378), 2023-08-07
Supplement: s1 [file s1]

## Supplementary Materials:

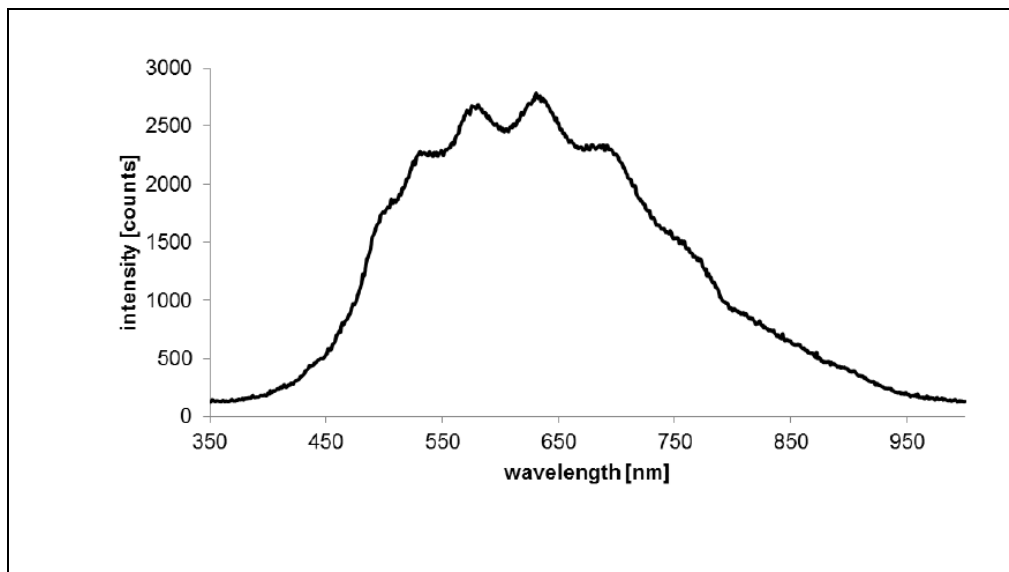

Figure S1: A widely known spectrum for tungsten-halogen lamp. A small UV fraction at 400 nm and shorter is observed.

SSA measurement for perovskite powders using acetic acid adsorption. Plots of  $\frac{C}{N} = \frac{1}{N_m b} + \frac{1}{N_m} C$  have been constructed as shown in Figure S2. The number of monolayer ( $N_m$ ) moles of acetic acid per 1 g perovskite, is calculated from the slope ( $1/N_m$ ). The acetic acid monolayer molecules per 1 g perovskite is determined. The adsorbent SSA is determined using the known acetic acid molecular cross-sectional area ( $2.1 \times 10^{-19} \text{ m}^2 \text{ molecule}^{-1}$ ).

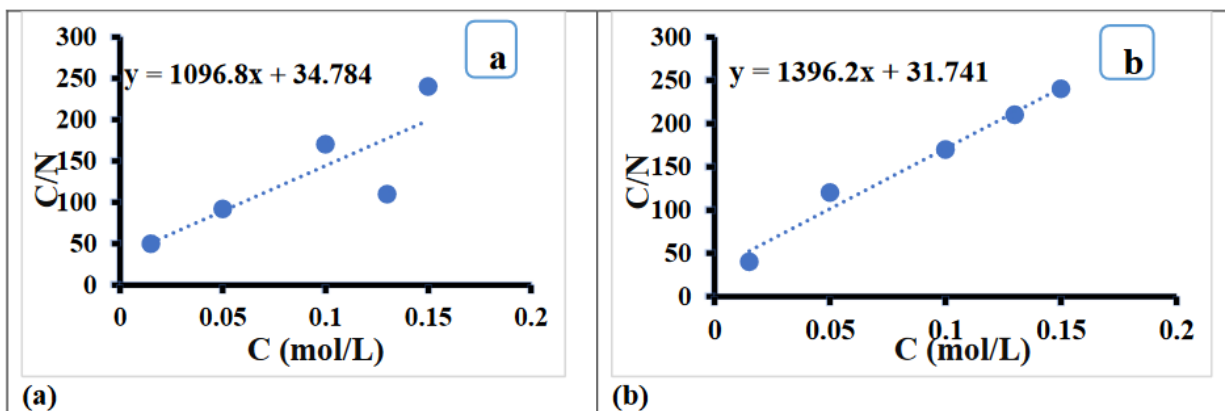

Figure S2: Langmuir plots constructed for acetic acid adsorption onto perovskite powders a)  $\text{ZnTiO}_3$  and b)  $\text{MnTiO}_3$  at room temperature.

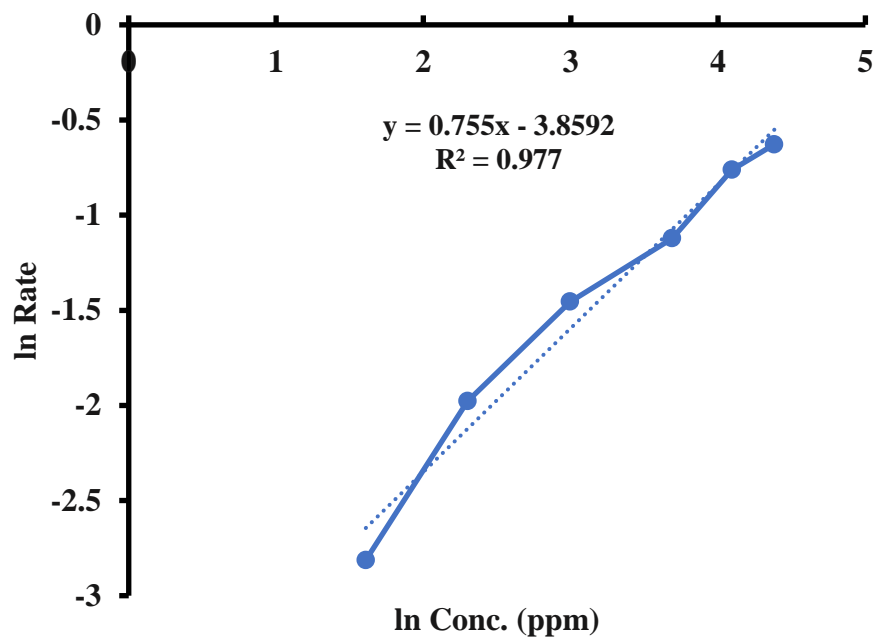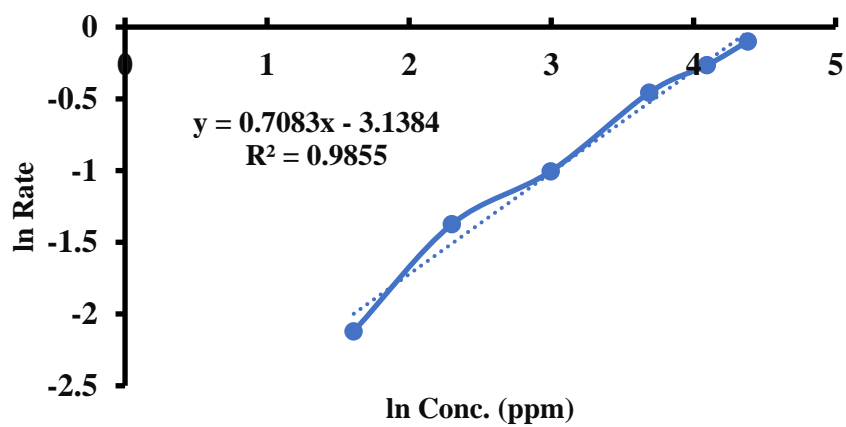

(a)

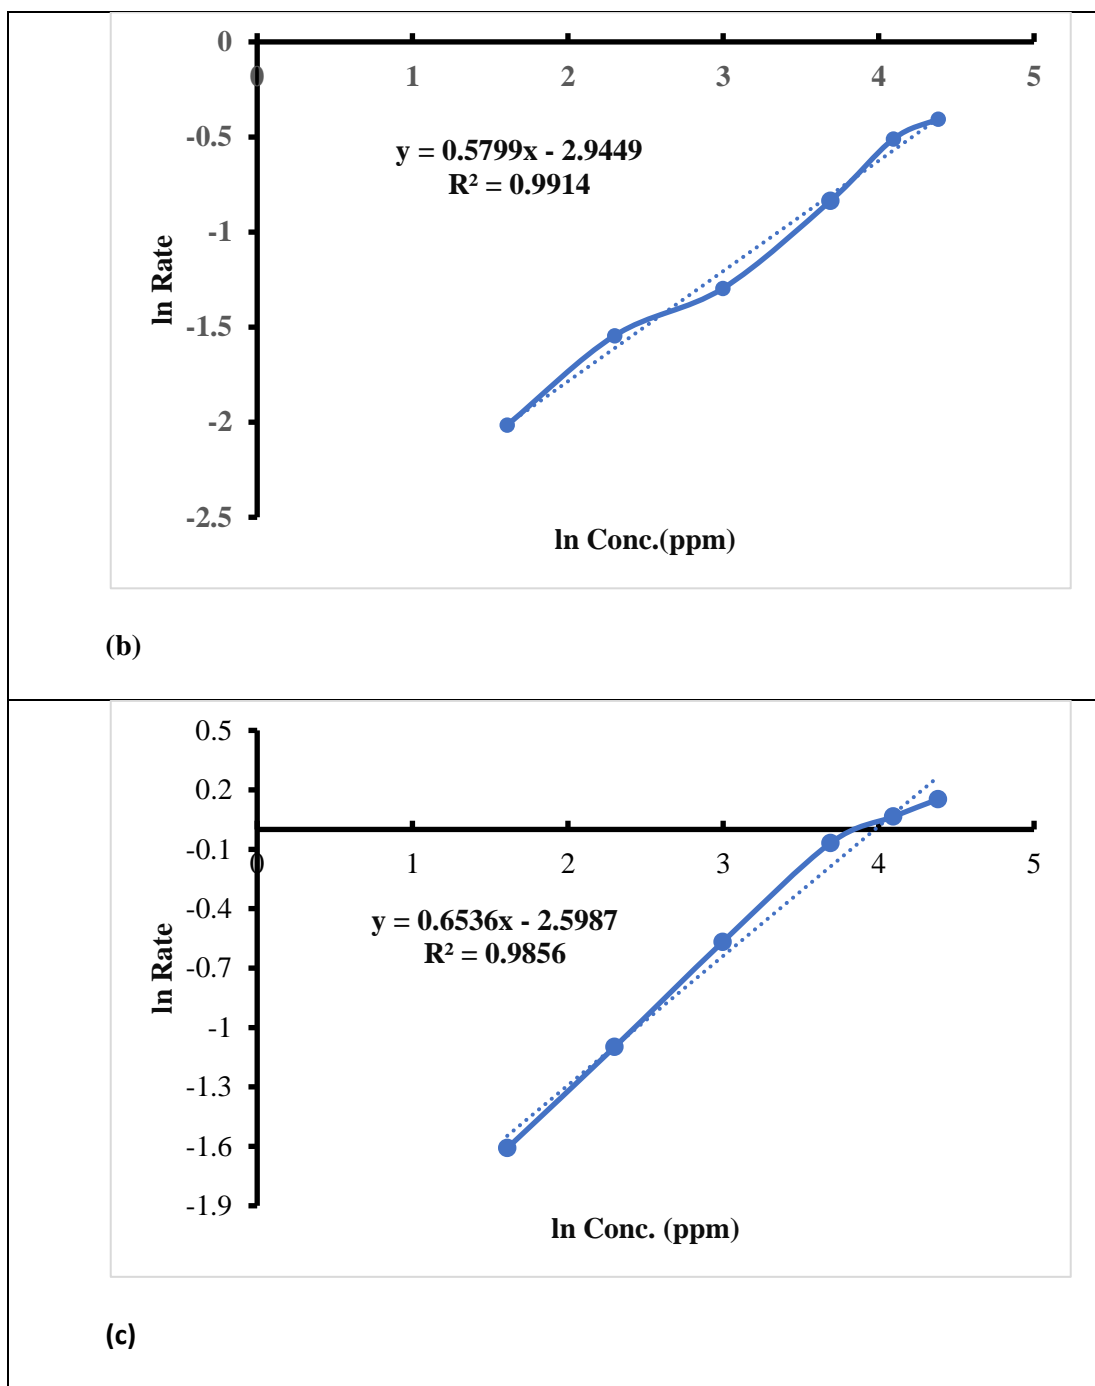

Figure S3: Plots of ln(initial rate) vs. ln(methylene blue initial concentration) using various catalyst systems. (a) ZnTiO<sub>3</sub> powder (0.1 g), (b) MnTiO<sub>3</sub> powder (0.1 g), (c) ZnTiO<sub>3</sub> film (2.3x10<sup>-3</sup> g) and (d) MnTiO<sub>3</sub> film (1.8x10<sup>-3</sup> g).

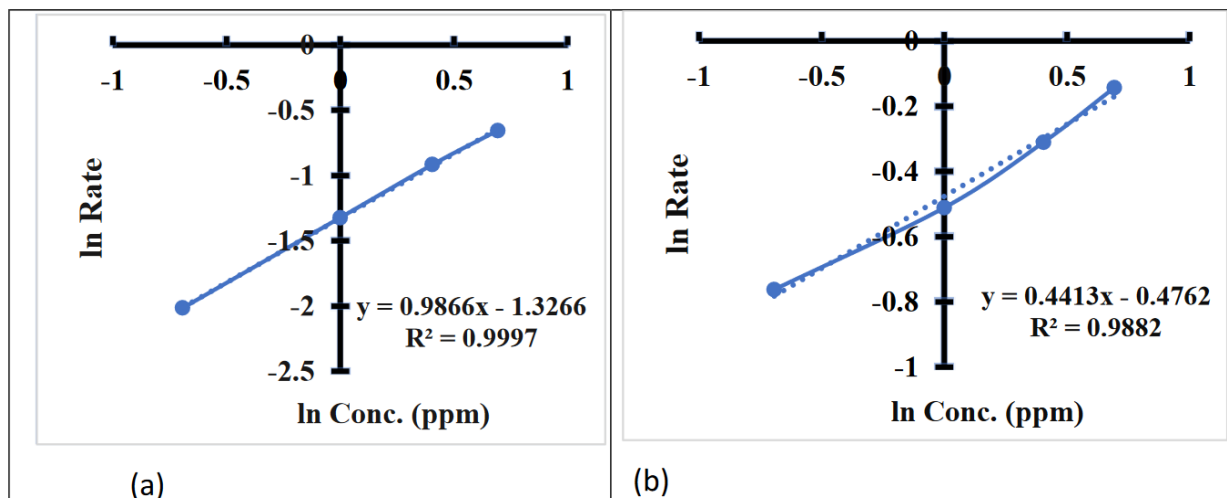

Figure S4: Effect of catalyst powder loading. Plots of ln(initial rate) vs. ln(Catalyst loading) for powder perovskites are shown for: (a) ZnTiO<sub>3</sub> and (b) MnTiO<sub>3</sub>. Values of rate or.

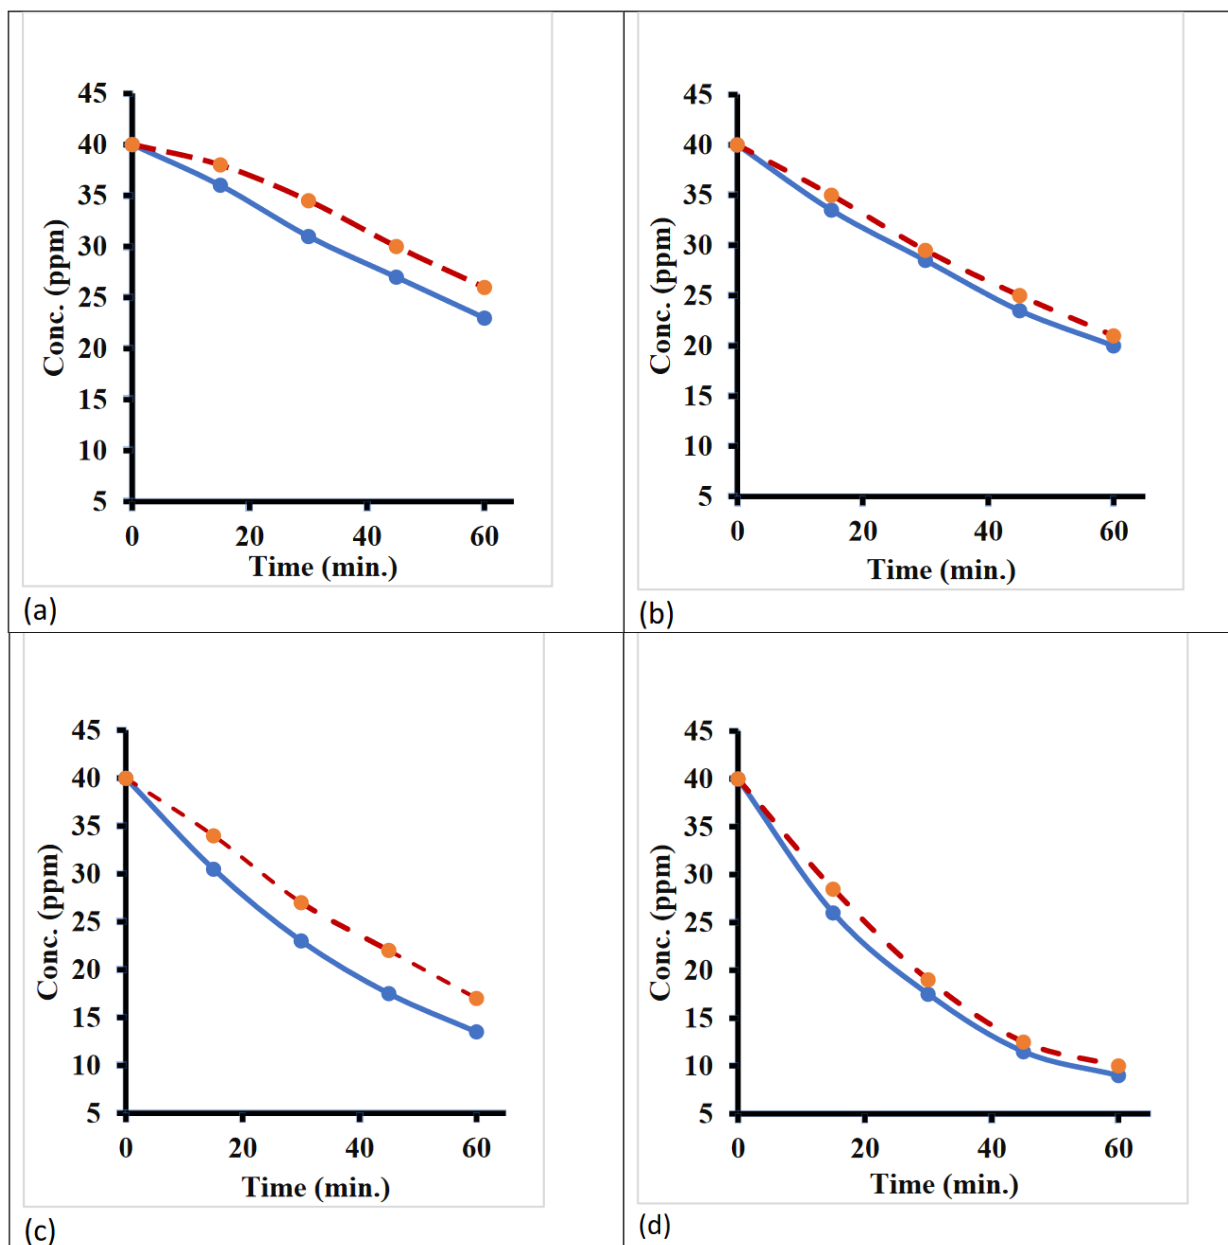

Figure S5: Perovskite catalyst efficiency after recovery and reuse in methylene blue photodegradation reaction. (a)  $\text{ZnTiO}_3$  powder (initially 0.1 g), (b)  $\text{ZnTiO}_3$  film, (c)  $\text{MnTiO}_3$  powder (initially 0.1 g) and (d)  $\text{MnTiO}_3$  film. Solid lines for fresh catalyst, and dashed lines for recovered catalyst
